# Supplementary material for: β2-Adrenergic Receptors Increase Cardiac Fibroblast Proliferation Through the Gαs/ERK1/2-Dependent Secretion of Interleukin-6
Source: MDPI journal article supplement (doi:10.3390/ijms21228507), 2020-11-12
Supplement: s1 [file s1]

**Supplemental Table S1.** Primer sequences used for RT-qPCR.

| Gene Name   | Reference Sequence  | Sequence                                                                                     |
|-------------|---------------------|----------------------------------------------------------------------------------------------|
| Rat ADRB1   | NM_012701           | Forward 5'-CAA GAC ACT GGG CAT CAT CA-3'<br>Reverse 5'-GCC AGT TGA AGA AGA CGA AGA-3'        |
| Mouse ADRB2 | NM_007419           | Forward 5'-GCT GAT CTG GTC ATG GGA TT-3'<br>Reverse 5'-CGT CAC ACA CAG CAC ATC TA-3'         |
| Rat ADRB2   | NM_012492           | Forward 5'-GAG CCT GCT GAC CAA GAA TAA-3'<br>Reverse 5'-GTG CAT CTG GAT AGG CAA GAA-3'       |
| Mouse ADRB2 | NM_007420           | Forward 5'-AAG AAT AAG CCC GAG TGG T-3'<br>Reverse 5'-GTa GGC CTG GTT CGT GAA GA-3'          |
| Rat IL1B    | <u>NM_031512</u>    | Forward 5'-CTA TGG CAA CTG TCC CTG AA-3'<br>Reverse 5'-GGC TTG GAA GCA ATC CTT AAT C-3'      |
| Mouse IL6   | <u>NM_001314054</u> | Forward 5'-CCT CCA TCC AGT TGC CTT CT-3'<br>Reverse 5'-CTC GA CTT GTG AAG TGG TAT AG-3'      |
| Rat IL6     | <u>NM_012589</u>    | Forward 5'-GAA GTT AGA GTC ACA GAA GGA GTG-3'<br>Reverse 5'-GTT TGC CGA GTA GAC CTC ATA G-3' |
| Rat IL10    | <u>NM_012854</u>    | Forward 3'-AGT GGA GCA GGT GAA GAA TG-3'<br>Reverse 3'-GAG TGT CAC GTA GGC TTC TAT G-3'      |
| Rat INFG    | <u>NM_138880</u>    | Forward 3'-TGG ATG CTA TGG AAG GAA AGA G-3'<br>Reverse 3'-GAC TTC AAA GAG TCT GAG GTA GAA-3' |
| Rat TNFA    | <u>NM_012675</u>    | Forward 3'-ACC TTA TCT ACT CCC AGG TTC T-3'<br>Reverse 3'-GGC TGA CTT TCT CCT GGT ATG-3'     |
| Mouse TPT-1 | NM_009429           | Forward 5'-ATC ATC TAC CGG GAC CTC ATC-3'<br>Reverse 5'-CCC TCT GTT CTA CTG ACC ATC T-3'     |
| Rat TPT-1   | NM_053867           | Forward 5'-CTG CTG CTT ACC ATC CAT CA-3'<br>Reverse 5'-ACA ATG CCT CCA CTC CAA ATA-3'        |

## Supplemental Figure 1

**A.**

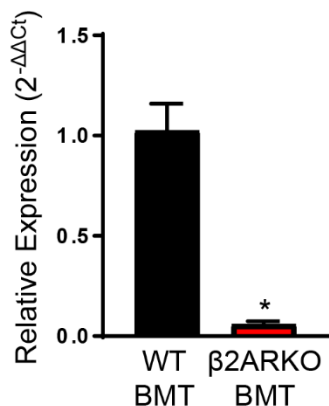

**B.**

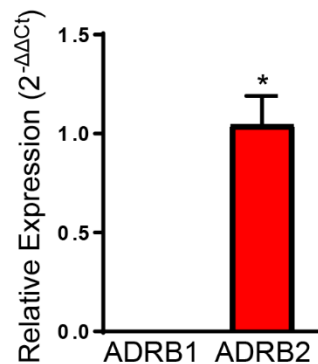

**C.**

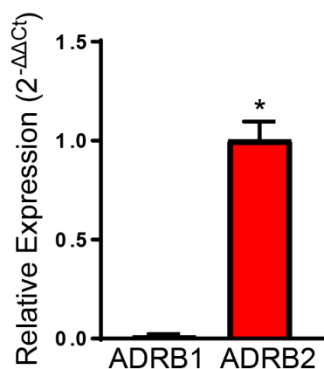

**Supplemental Figure S1.  $\beta$ AR subtype expression.** **A.** ADRB2 expression was quantified in reconstituted BM from WT and  $\beta 2$ ARKO BMT mice by RT-qPCR. Expression is shown relative to WT BMT.  $n=4$ , t test, \*  $p < 0.05$ . **B.** ADRB1 and ADRB2 expression was quantified in RNCF using RT-qPCR. Expression is shown relative to ADRB2 expression.  $n=6$ , t test, \*  $p < 0.05$  versus ADRB1. **C.** RT-qPCR was used to measure ADRB1 and ADRB2 expression in AMCF. Expression is shown relative to ADRB2 expression.  $n=$ , t test, \*  $p < 0.05$  versus ADRB1.

**Supplemental Figure 2**

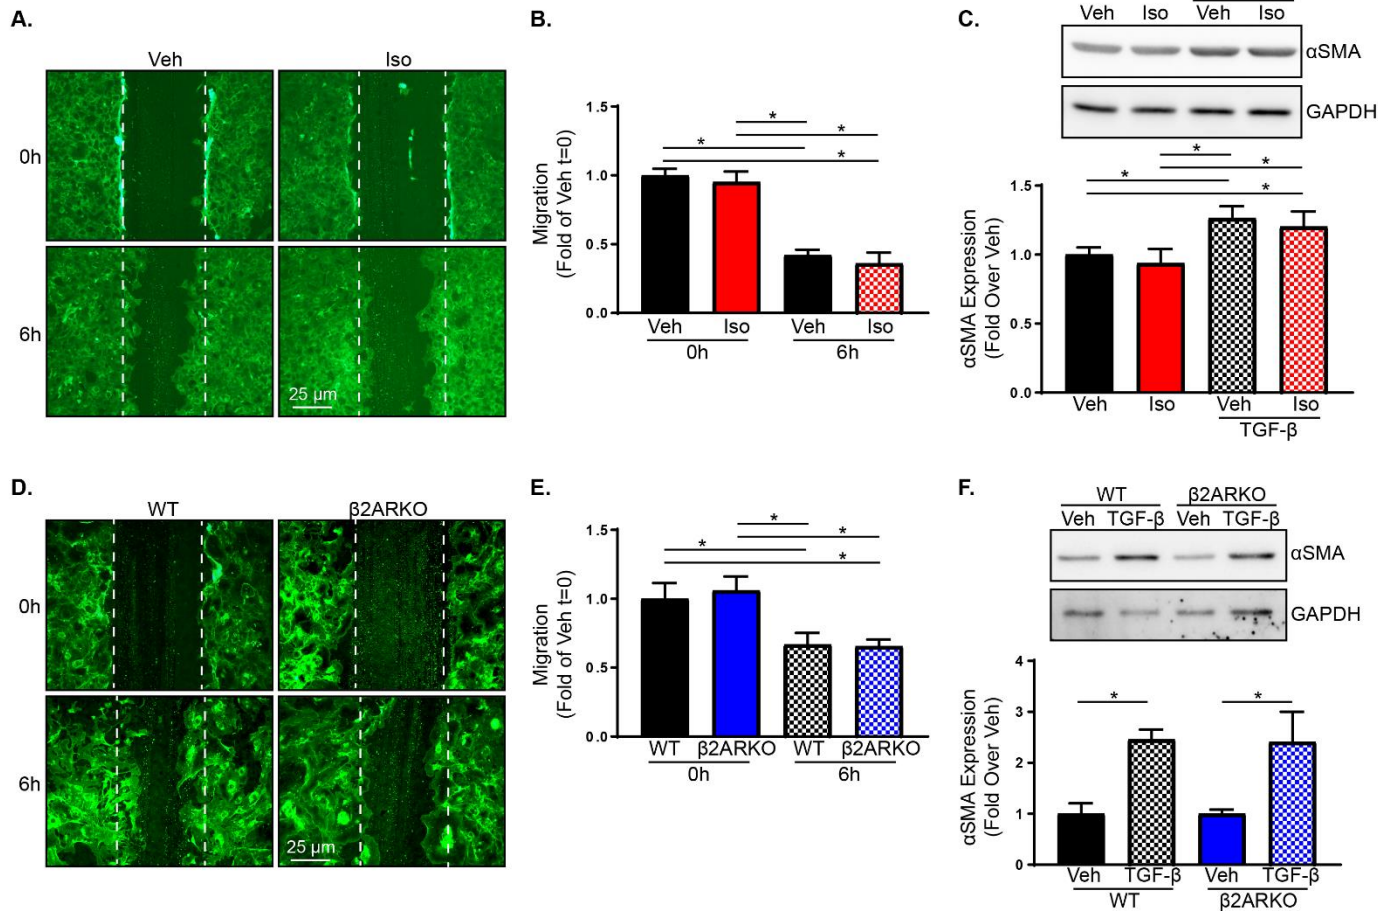

**Supplemental Figure S2.** The impact of  $\beta$ 2AR on fibroblast functions. **A.** Representative scratch assay images from time=0 and 6h post-scratch RNCF treated with vehicle or isoproterenol. **B.** Quantified scratch assay data from vehicle and isoproterenol treated RNCF. Scratch area is normalized to vehicle treated time=0 RNCF. n=6, Two-Way ANOVA, \*  $p < 0.05$ . **C.**  $\alpha$ -smooth muscle actin immunoblot in RNCF treated with TGF- $\beta$  in the presence or absence of isoproterenol. Expression is normalized to GAPDH and expressed as fold over vehicle. n=6, One-Way ANOVA, \*  $p < 0.05$ . **D.** Representative scratch assay images from time=0 and 6h post-scratch in WT and  $\beta$ 2ARKO AMCF. **E.** Quantified scratch assay data from WT and  $\beta$ 2ARKO AMCF. Scratch area is normalized to WT time=0 AMCF. n=3, Two-Way ANOVA, \*  $p < 0.05$ . **F.** Immunoblot for  $\alpha$ -smooth muscle actin expression in WT and  $\beta$ 2ARKO AMCF treated with vehicle or TGF- $\beta$ . Expression is normalized to GAPDH and expressed as fold over WT vehicle. n=3, One-Way ANOVA, \*  $p < 0.05$ .

### Supplemental Figure 3

A.

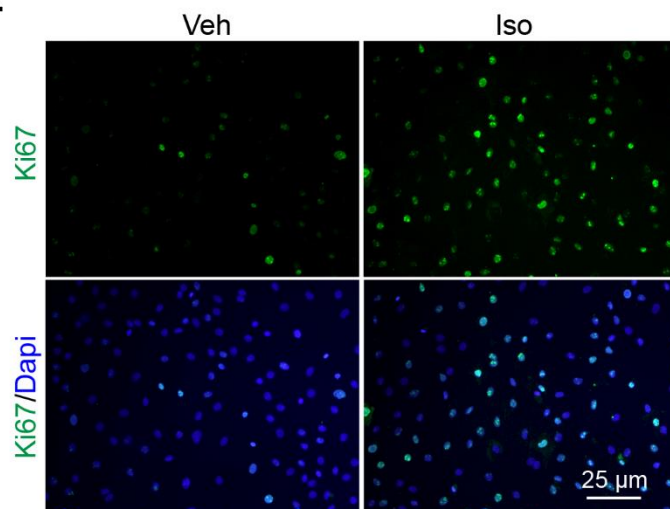

B.

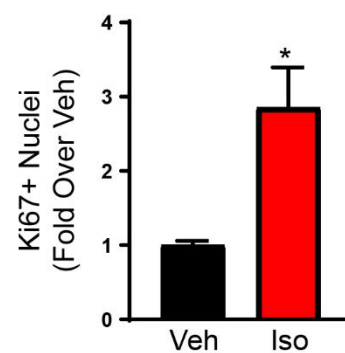

**Supplemental Figure S3.**  $\beta$ 2AR increases fibroblast proliferation. **A.** Representative Ki67 (green, upper row) immunocytochemistry of RNCF treated with vehicle or isoproterenol. Ki67 merged with DAPI (blue) is shown in the lower panel. **B.** Quantification of Ki67-positive cells from vehicle and isoproterenol treated RNCF.  $n=8$ , t test, \*  $p < 0.05$ .

## Supplemental Figure 4

A.

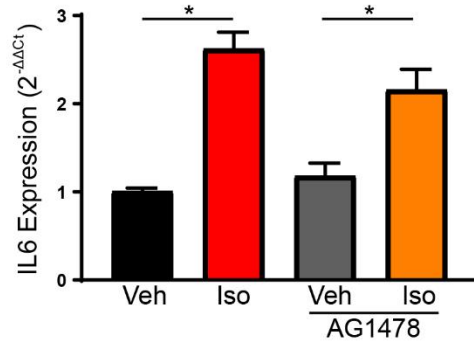

B.

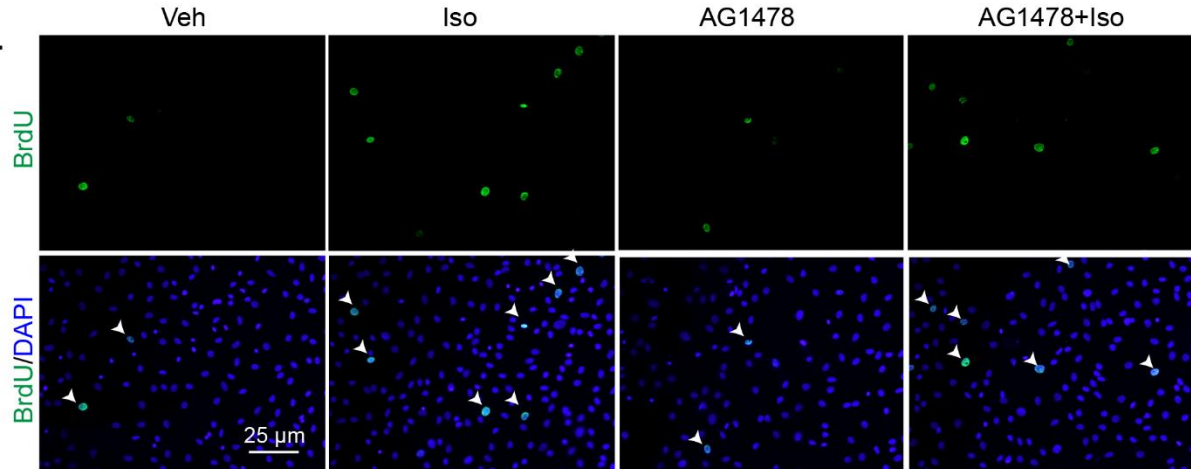

C.

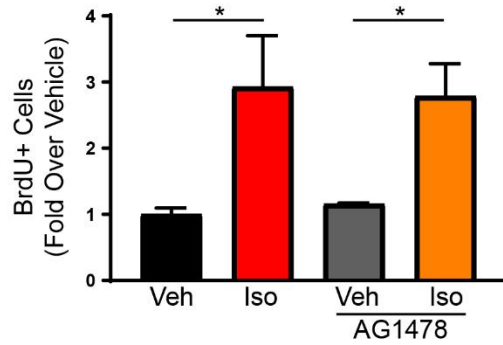

**Supplemental Figure S4.**  $\beta$ 2AR-mediated G protein-independent signaling in cardiac fibroblasts. **A.** IL6 transcript expression was measured in RNCF treated with vehicle or isoproterenol in the presence or absence of AG1478.  $n=6$ , One-Way ANOVA, \*  $p < 0.05$ . **B.** Representative BrdU (green) staining alone (top) or merged with DAPI (bottom) and quantification of BrdU-positive cells (**C**) from RNCF treated with vehicle or isoproterenol with or without pre-incubation with AG1478. Arrows indicate BrdU-positive nuclei.  $n=3$ , One-Way ANOVA, \*  $p < 0.05$ .

# Supplemental Figure 5

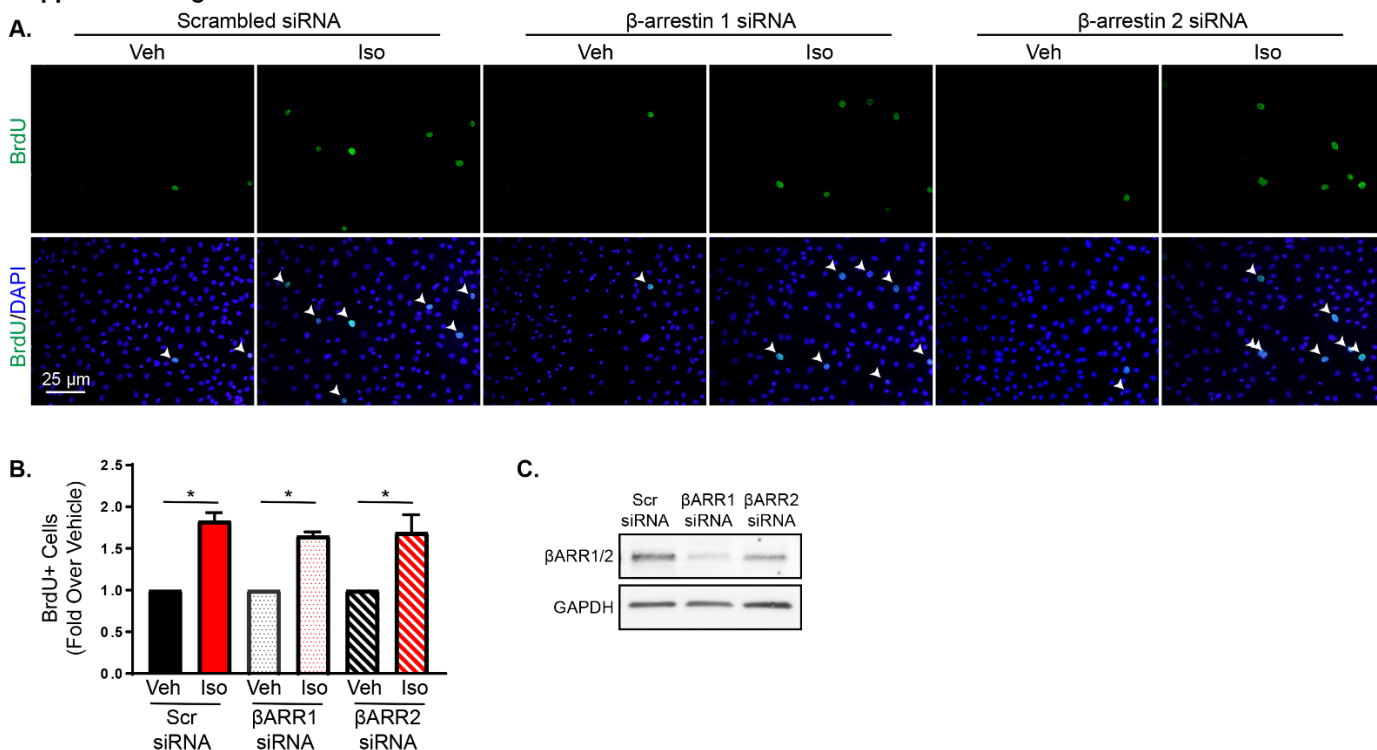

**Supplemental Figure S5.**  $\beta$ -Arrestin involvement in isoproterenol-mediated proliferation. **A.** Representative BrdU (green) staining alone (top) or merged with DAPI (bottom) and quantification of BrdU-positive cells (**B**) from scrambled,  $\beta$ -arrestin 1 or  $\beta$ -arrestin 2 siRNA transfected RNCf treated with vehicle or isoproterenol. Arrows indicate BrdU-positive nuclei.  $n=4$ , One-Way ANOVA, \*  $p < 0.05$ . **C.** Immunoblot confirmation of  $\beta$ -arrestin 1 and 2 knockdown with scrambled,  $\beta$ -arrestin 1 or  $\beta$ -arrestin 2 siRNA transfection. GAPDH is shown as a loading control.

## Supplemental Figure 6

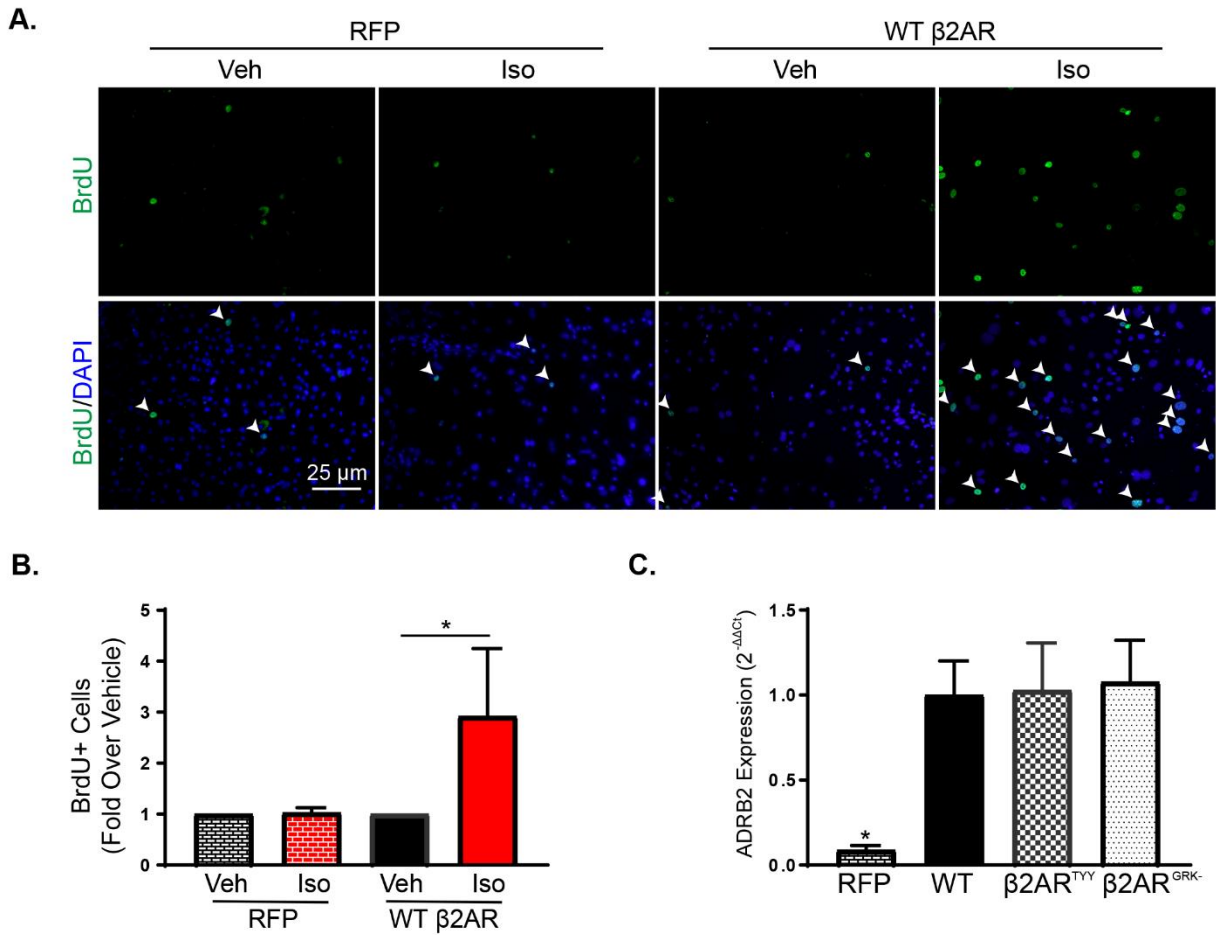

**Supplemental Figure S6.**  $\beta$ 2AR-mediated G protein-dependent and independent signaling in fibroblast proliferation. **A.**

Representative BrdU (green) staining alone (top) or merged with DAPI (bottom) and quantification of BrdU-positive nuclei (**B**) from vehicle and isoproterenol treated  $\beta$ 2ARKO AMCF that were transduced with WT  $\beta$ 2AR or RFP control lentivirus. Arrows indicate BrdU-positive nuclei. n=6, One-Way ANOVA, \* p < 0.05. **C.** ADRB2 expression was quantified by RT-qPCR in  $\beta$ 2ARKO AMCF that were transduced with lentivirus for WT  $\beta$ 2AR,  $\beta$ 2AR<sup>TYT</sup>,  $\beta$ 2AR<sup>GRK-</sup> or RFP control virus. n=6, One-Way ANOVA, \* p < 0.05 versus WT  $\beta$ 2AR.

## Supplemental Figure 7

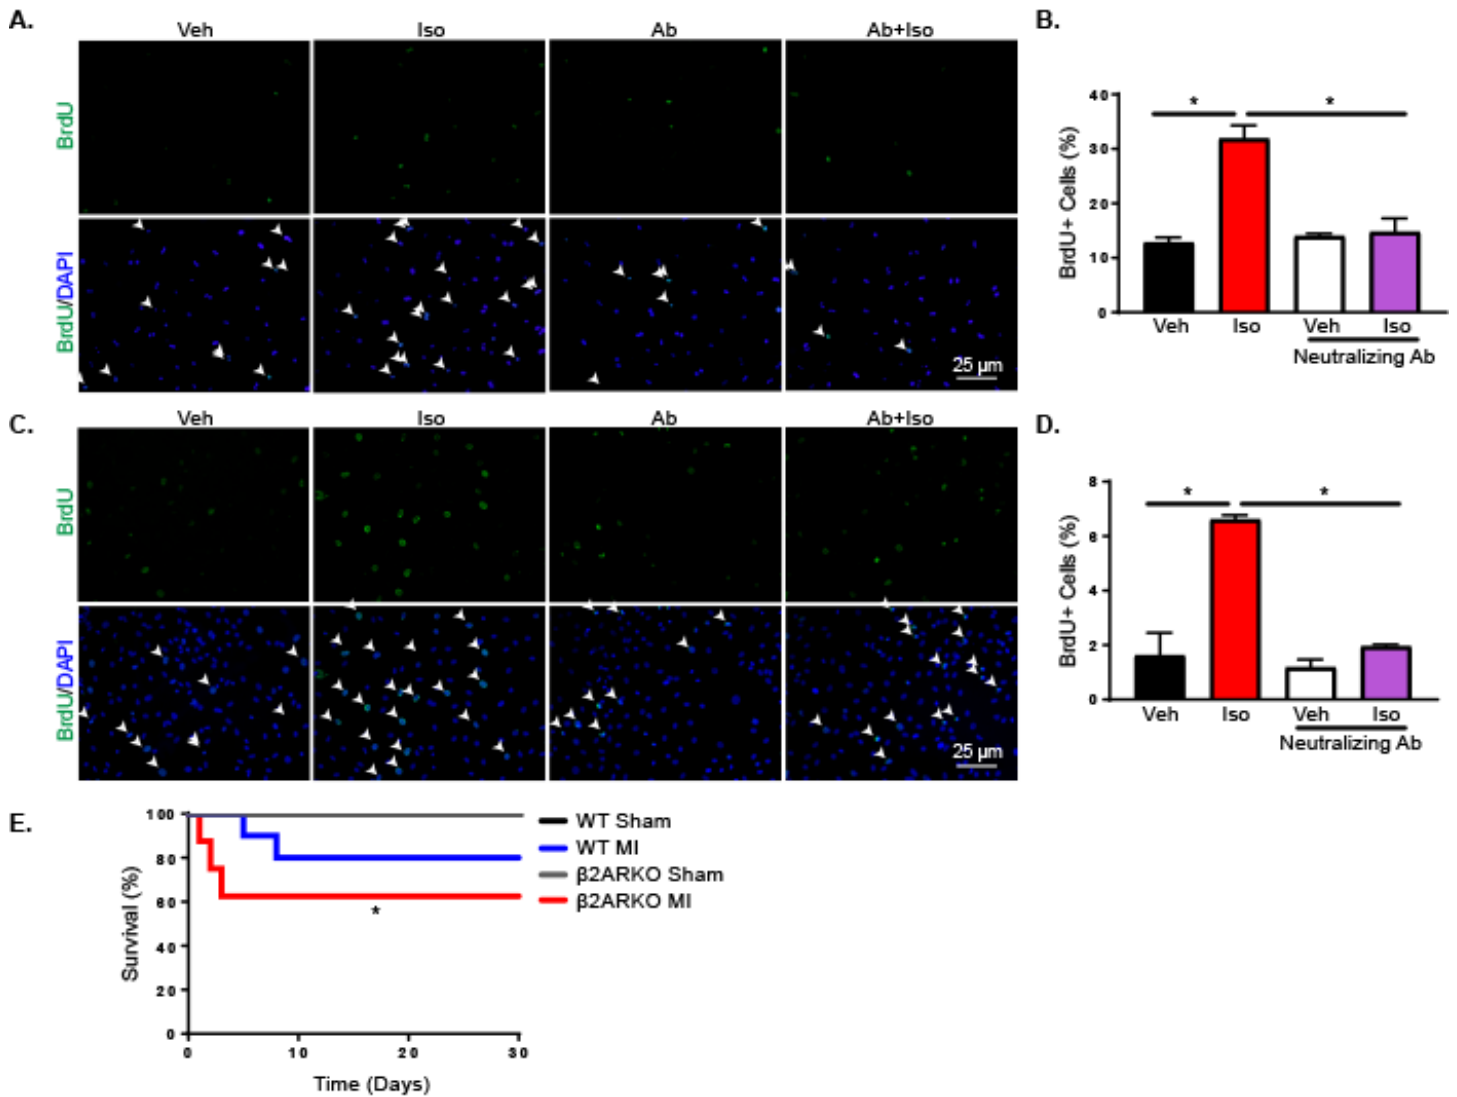

**Supplemental Figure S7.** Dermal fibroblasts were isolated from WT mice and treated with vehicle or isoproterenol in the presence or absence of an IL-6 neutralizing antibody. **A.** Representative BrdU (green) staining alone (top) or merged with DAPI (bottom) and quantification of BrdU-positive nuclei (**B**) from vehicle and isoproterenol treated dermal fibroblasts. Arrows indicate BrdU-positive nuclei.  $n=3$ , One-Way ANOVA, \*  $p < 0.05$ . **C.** Representative BrdU (green) staining alone (top) or merged with DAPI (bottom) from mouse embryonic fibroblasts treated with vehicle or isoproterenol with or without IL-6 neutralizing antibody pretreatment. Arrows indicate BrdU-positive nuclei. **D.** Quantification of mouse embryonic fibroblast BrdU staining.  $n=4$ , One-Way ANOVA, \*  $p < 0.05$ . **E.** Survival over time in WT and  $\beta 2$ ARKO mice following sham or myocardial infarction surgery.  $n=10$ . Log-rank, \*  $p < 0.05$ .
